# Supplementary material for: Combination of Coagulation and Ozone Catalytic Oxidation for Pretreating Coking Wastewater
Source: MDPI journal article supplement (doi:10.3390/ijerph16101705), 2019-05-15
Supplement: s1 [file s1]

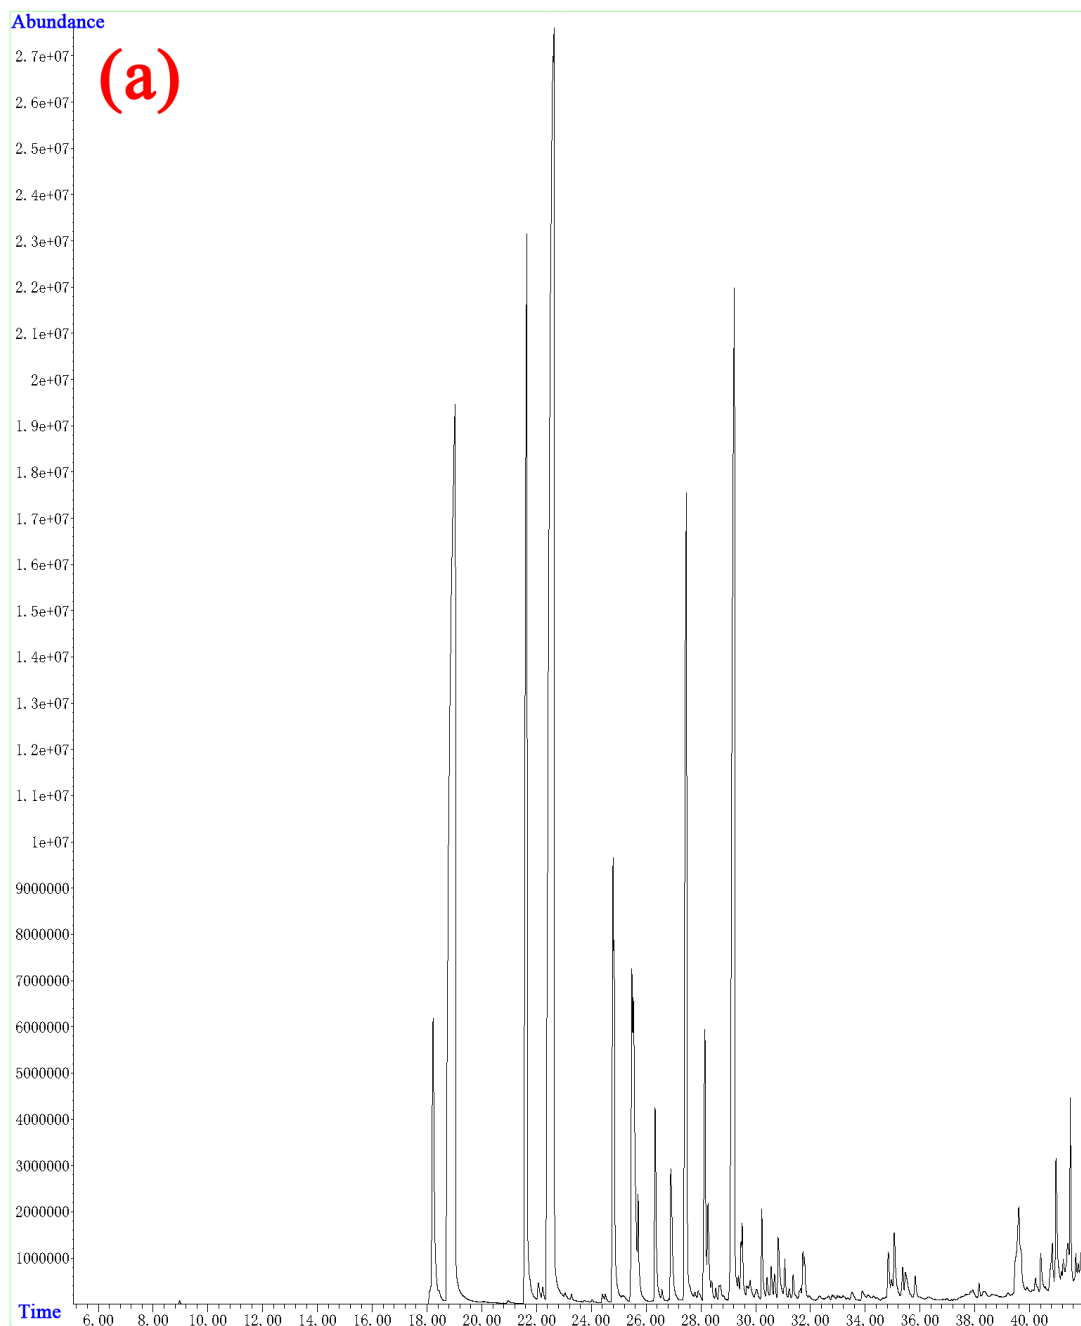

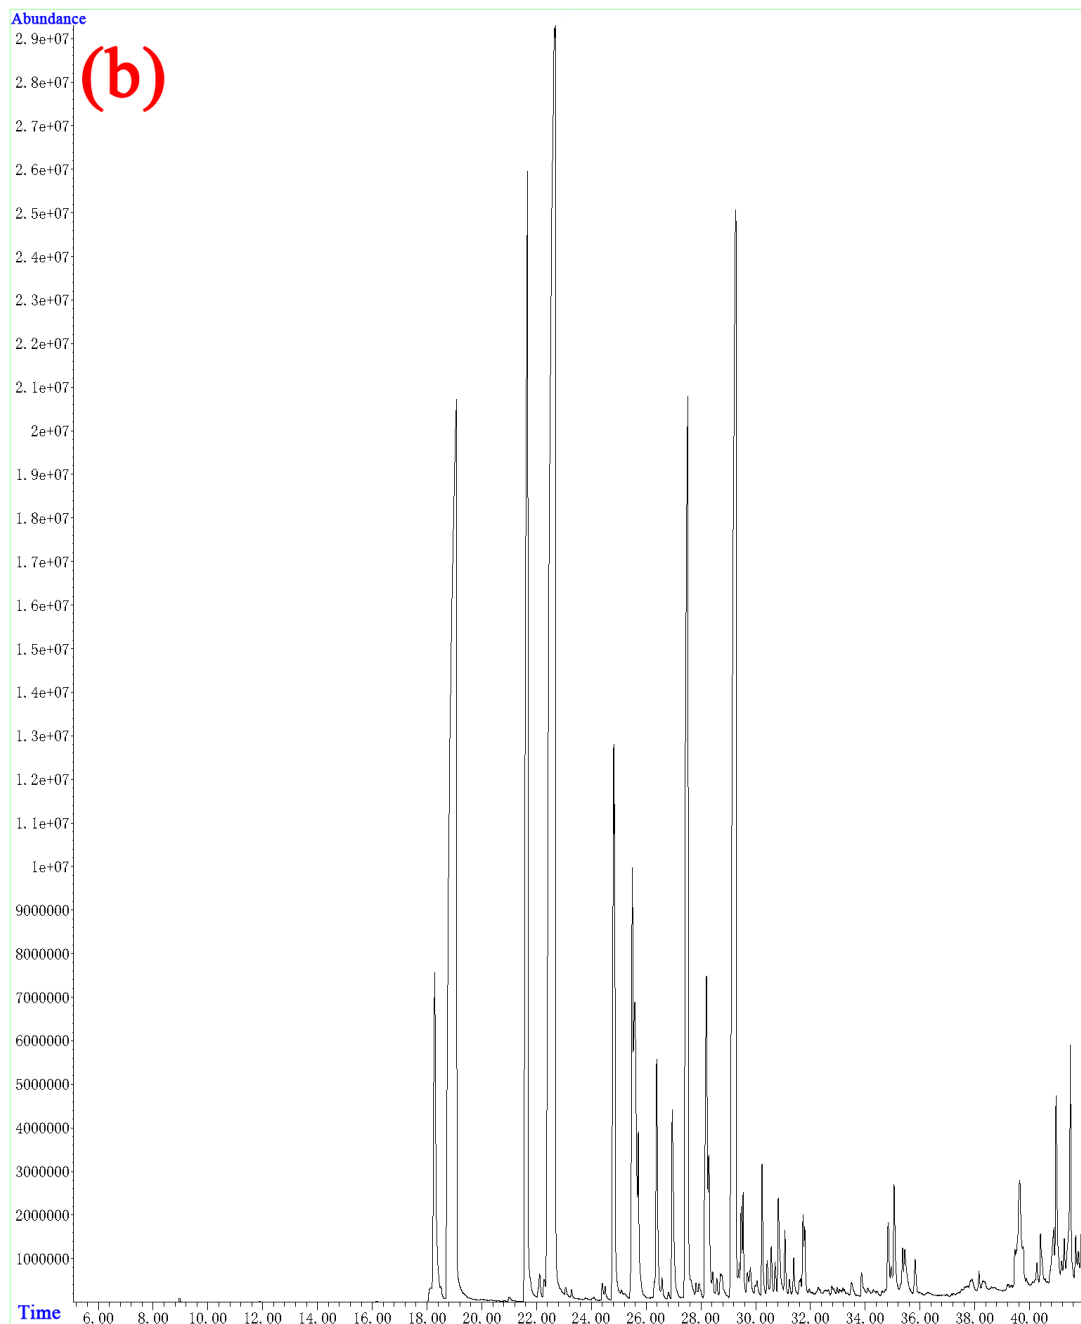

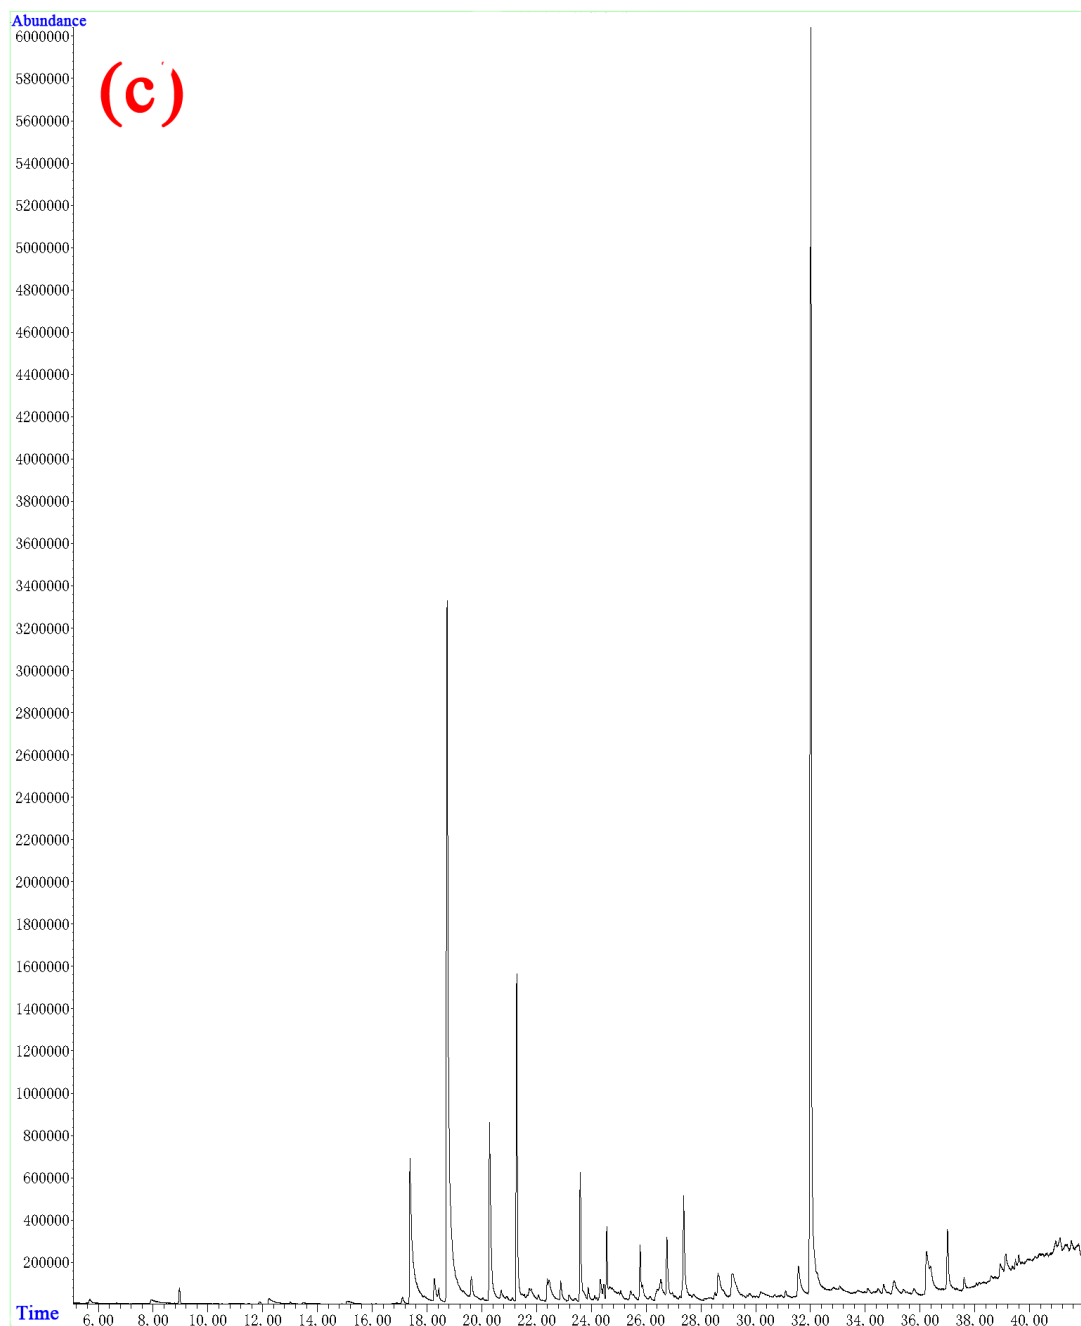

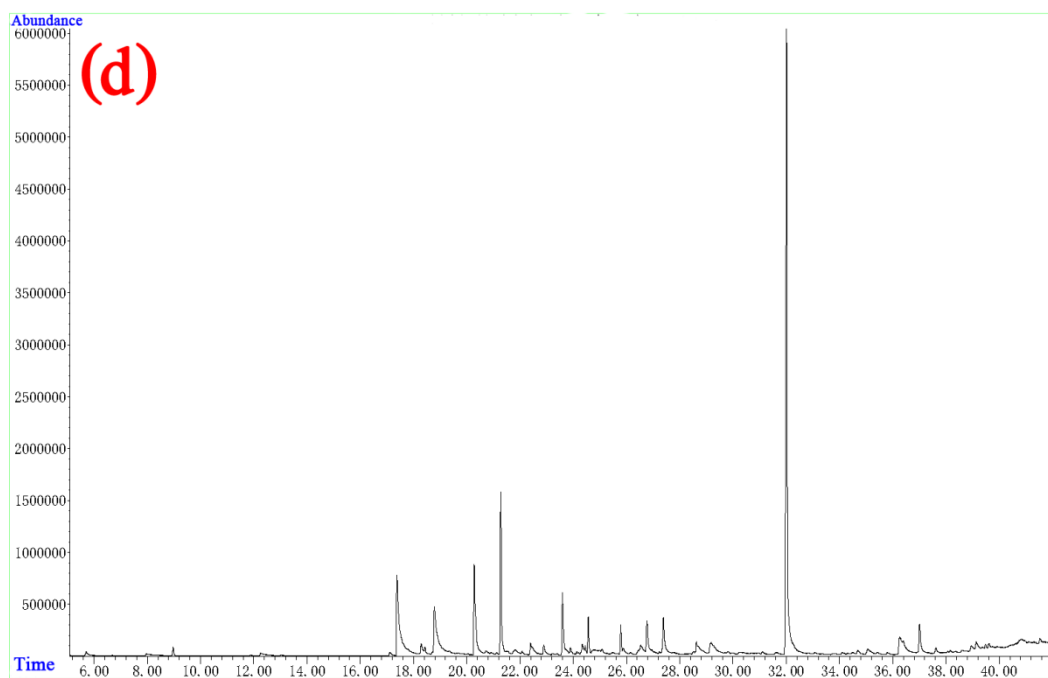

Fig. S1 GC–MS diagram of effluent from different processes: (a) raw water; (b) coagulation; (c) coagulation + O<sub>3</sub> catalytic oxidation; (d) coagulation + O<sub>3</sub> catalytic oxidation with addition of H<sub>2</sub>O<sub>2</sub>
